# Supplementary material for: Oligoclonal Band Status in Scandinavian Multiple Sclerosis Patients Is Associated with Specific Genetic Risk Alleles
Source: PLoS One. 2013 Mar 5;8(3):e58352. doi: 10.1371/journal.pone.0058352 (PMC3589422; doi:10.1371/journal.pone.0058352)
Supplement: File S1 — List of the principle investigators in the International Multiple Sclerosis Genetic Consortium (IMSGC). (DOCX) [file pone.0058352.s004.docx]

List of the principle investigators in the IMSGC**:**

**International Multiple Sclerosis Genetic Consortium (IMSGC) membership**

Lisa Barcellos1, David Booth2, Manuel Comabella3, Alastair Compston4, Sandra D’Alfonso5, Philip De Jager6, Bertrand Fontaine7, An Goris8, David Hafler9, Jonathan Haines10, Hanne F. Harbo11, Stephen L. Hauser12, Clive Hawkins13, Bernhard Hemmer14, Jan Hillert15, Adrian Ivinson16, Ingrid Kockum17, Roland Martin18, Filippo Martinelli Boneschi19, Jacob L. McCauley20 Jorge Oksenberg12, Tomas Olsson17, Annette Oturai21, Nikolaos Patsopoulos6, Margaret Pericak-Vance20, Janna Saarela22, Stephen Sawcer4, Anne Spurkland23, Graeme Stewart2, Frauke Zipp24

1Genetic Epidemiology and Genomics Laboratory, Division of Epidemiology, School of Public Health, University of California, Berkeley, California, USA.

2 Westmead Millennium Institute, University of Sydney, New South Wales 2145, Australia.

3 Clinical Neuroinmunology Unit, Multiple Sclerosis Center of Catalonia (CEM-Cat), Vall d’Hebron University Hospital, Barcelona, Spain.

4 Department of Clinical Neurosciences, University of Cambridge, Addenbrooke’s Hospital, Cambridge, CB2 0QQ, UK

5 Department of Medical Sciences and Interdisciplinary Research Center of Autoimmune Diseases (IRCAD), University of Eastern, Piedmont, Novara, Italy

6 Department of Neurology, Brigham & Women’s Hospital and Harvard Medical School, Boston, MS, USA

7 INSERM UMR S 975 CRICM, UPMC, Département de neurologie Pitié-Salpêtrière, AP-HP, Paris, France

8Laboratory for Neuroimmunology, Section for Experimental Neurology, Katholieke Universiteit Leuven, Leuven, Belgium

9 Departments of Neurology and Immunobiology, Yale School of Medicine, New Haven, CT, USA.

10 Center for Human Genetics Research, Vanderbilt University Medical Center, 519 Light Hall, Nashville, Tennessee 37232, USA

11 Department of Neurology, Oslo University Hospital, Ullevål and University of Oslo, Oslo Norway

12 Department of Neurology, University of California San Francisco, San Francisco, USA

13 Keele University Medical School, Stoke-on-Trent ST4 7NY, UK

14 Klinik fur Neurologie, Klinikum rechts der Isar, Technische Universitat, Munchen, Germany

15 Department of Clinical Neurosciences, Center for Molecular Medicine, Karolinska Institutet, Karolinska University Hospital, Stockholm, Sweden.

16 Harvard NeuroDiscovery Center, Harvard Medical School, Boston, Massachusetts, USA.

17 Department of Clinical Neuroscience, Neuroimmunology Unit, Center for Molecular Medicine, Karolinska Institutet, Stockholm, Sweden

18 Institute for Neuroimmunology and Clinical MS Research (inims), Centre for Molecular Neurobiology, Falkenried 94, D-20251 Hamburg, Germany.

19 Department of Neurology, Institute of Experimental Neurology (INSPE), Division of Neuroscience, San Raffaele Scientific Institute, Milan, Italy

20 John P. HussmanInstitute for HumanGenomics and The Dr. John T Macdonald Foundation Department of Human Genetics, University of Miami, Miller School of Medicine, Miami, Florida , USA

21 Danish Multiple Sclerosis Center, University of Copenhagen and Department of Neurology, Rigshospitalet, Copenhagen, Denmark

22 Institute for Molecular Medicine Finland FIMM, University of Helsinki, Helsinki, Finland

23 Institute of Basal Medical Sciences, University of Oslo, Norway

24 Department of Neurology, University Medicine Mainz, Johannes Gutenberg University Mainz, Mainz, Germany.
